# Supplementary material
Source: Research Square preprint supplement (doi:10.21203/rs.3.rs-10327705/v1)
Supplement: Supplementary file 1 [file b05691f97dcc95e1e9ea135a.docx]

# **CONSORT 2010 Checklist**

*Manuscript: Outcomes of Co-Designed, Place-Based Nutrition Interventions on the Nutritional Status of Women and Young Children in Rural North-Eastern Ghana: A Cluster-Randomized Controlled Trial*

Authors: Vincent Adocta Awuuh, Charles Apprey, Reginald Adjetey Annan

| **Item No.** | **Standard CONSORT 2010 checklist item** | **Extension for cluster-randomised designs (Campbell et al., 2012)** | **Reported on page** |
| --- | --- | --- | --- |
| 1a | Identification as a randomised trial in the title | Identification as a cluster randomised trial in the title | p.1 |
| 1b | Structured summary of trial design, methods, results and conclusions | Cluster design, number of communities/participants per arm, and randomisation level reported in structured abstract | p.2 |
| 2a | Scientific background and explanation of rationale | Rationale for the trial | pp.3–6; p.12 |
| 2b | Specific objectives or hypotheses | Objectives are framed at the individual participant (mother/child) level; not explicitly distinguished from the cluster level in the objective statement | p.2, p.7 |
| 3a | Description of trial design (e.g., parallel, factorial), including allocation ratio | Definition of the cluster (community) and description of how design features apply to clusters | p.7 |
| 3b | Important changes to methods after trial commencement, with reasons |  | n/a |
| 4a | Eligibility criteria for participants | Eligibility criteria for clusters: East Mamprusi purposively selected for high burden; 10 communities across 5 sub-districts randomly included | p.7 |
| 4b | Settings and locations where data were collected |  | p.7 |
| 5 | The interventions for each group with sufficient detail to allow replication | Intervention (MCNFHI) operates at multiple levels community, household, group/economic, and institutional described per TIDieR checklist | pp.9–11 |
| 6a | Completely defined pre-specified primary and secondary outcomes, incl. how/when assessed | Outcomes explicitly defined at the individual (mother/child) level, not the cluster level | p.13 |
| 6b | Any changes to trial outcomes after the trial commenced, with reasons |  | n/a |
| 7a | How sample size was determined | Method of calculation, number of clusters (10; 5 per arm), average cluster size (~25 households), assumed ICC (0.05) and resulting design effect (2.2) reported; authors note the base calculation was for individual randomisation with a post-hoc clustering adjustment | pp.7–8 |
| 7b | Explanation of any interim analyses and stopping guidelines |  | n/a |
| 8a | Method used to generate the random allocation sequence | Public “fish-bowl” (lottery) draw of community names, witnessed by community leaders and research team | p.12 |
| 8b | Type of randomisation; details of any restriction | Stratified by 5 sub-districts; one community per stratum allocated to each arm | p.8 |
| 9 | Mechanism used to implement the random allocation sequence, describing steps to conceal the sequence until assignment | Allocation was at the cluster (community), not individual, level; explicitly no formal concealment procedure beyond a blind public draw | p.12 |
| 10a | Who generated the random allocation sequence, who enrolled clusters, and who assigned clusters to interventions | Community leaders/representatives and research team members conducted and witnessed the draw; roles of “generating” vs “enrolling” are not separately distinguished | p.12 |
| 10b | Mechanism by which individual participants were included in clusters | 24 households randomly selected within each of the 10 communities | p.8 |
| 10c | From whom consent was sought, and whether before or after randomisation | Individual written informed consent was obtained from mothers (parental consent for children); the manuscript does not explicitly state whether household consent was sought before or after community-level randomization | p.14 |
| 11a | If done, who was blinded after assignment to interventions, and how | Participants, CNVs, and field data collectors not blinded (not practicable given intervention nature); laboratory staff analysing blood samples were blinded to allocation | p.12 |
| 11b | If relevant, description of the similarity of interventions | Not applicable, open, community-embedded behavioural/economic intervention vs standard Ghana Health Service care | n/a |
| 12a | Statistical methods used to compare groups for primary and secondary outcomes | Not statistically adjusted for in the primary analysis. Due to the small number of clusters randomized (n = 10), mixed-effects modelling at the cluster level was judged underpowered and not conducted; non-parametric tests were therefore run at the individual level and are reported as exploratory comparisons rather than cluster-adjusted estimates. No formal intra-cluster correlation coefficient or covariate adjustment for clustering was performed, and this is discussed as a limitation | methods p.13–14; limitation p.32 |
| 12b | Methods for additional analyses, such as subgroup and adjusted analyses | Absolute and relative effect sizes (risk ratios, 95% CI) calculated for principal binary outcomes; no cluster-adjusted or subgroup analyses performed | pp.22–23 |
| 13a | For each group: numbers randomly assigned, receiving intended treatment, analysed for primary outcome | Numbers of clusters (5 intervention / 5 control communities) and participants (124/124 randomised; 109/102 analysed) given in Figure 1 and its legend | p.8 |
| 13b | For each group, losses and exclusions after randomisation, with reasons | Individual-level losses reported (15 intervention, 22 control lost to follow-up); no cluster-level losses — all 10 communities were retained throughout | p.8 |
| 14a | Dates defining periods of recruitment and follow-up | November 2023 – May 2024 | pp.7–8 |
| 14b | Why the trial ended or was stopped |  | n/a |
| 15 | A table showing baseline demographic and clinical characteristics for each group | Table 1 gives individual-level baseline characteristics; a significant baseline imbalance across arms (ethnicity, water/sanitation source, food security) attributable to whole-community randomisation is reported and discussed as a limitation. No separate cluster-level baseline table is provided | Table 1, pp.15–16; limitation p.32 |
| 16 | For each group, number of participants included in each analysis, and whether by original assigned group | Individual participant numbers given for each analysis (Tables 4–9); the number of clusters contributing to each analysis (5 per arm throughout) is not restated table-by-table | pp.16–28 |
| 17a | For each outcome: results for each group and the estimated effect size with precision (e.g., 95% CI) | Results presented at the individual level; no intracluster correlation coefficient (ICC) is reported for the observed outcomes (only the assumed ICC of 0.05 used a priori in the sample-size calculation is given) | pp.16–23 |
| 17b | For binary outcomes, presentation of both absolute and relative effect sizes | Table 5a reports absolute and relative effect sizes (risk ratios, 95% CI) for the principal binary outcomes | pp.22–23 |
| 18 | Results of any other analyses performed, distinguishing pre-specified from exploratory | Mann–Whitney U and Wilcoxon signed-rank within- and between-group comparisons (Tables 6–9) | pp.23–28 |
| 19 | All important harms or unintended effects in each group | No adverse events or unintended harms related to the intervention or study procedures were reported by participants or Community Nutrition Volunteers during the six-month intervention period; participants identified with anaemia or malnutrition through screening were referred for standard clinical care | pp.28 |
| 20 | Trial limitations, addressing sources of potential bias, imprecision, and multiplicity of analyses | Discusses short intervention duration; small number of clusters increasing residual-confounding risk; baseline imbalance from whole-community randomisation; no ICC/covariate adjustment for clustering; lack of blinding; no cost-effectiveness analysis; seasonal timing of food-security data | pp.32–33 |
| 21 | Generalisability (external validity, applicability) of trial findings | Discussed for similar high-burden rural districts in Ghana and comparable LMIC settings, with a seasonal-timing caveat; not separately distinguished for cluster- vs individual-level generalisability | p.33 |
| 22 | Interpretation consistent with results, balancing benefits and harms, considering other evidence |  | pp.29–33 |
| 23 | Registration number and name of trial registry | PACTR202412697952932, Pan African Clinical Trial Registry; retrospective registration explicitly disclosed in the abstract and Declarations | p.2, p.14, p.34 |
| 24 | Where the full trial protocol can be accessed, if available | Full trial protocol stated as available from the corresponding author on reasonable request | p.34 |
| 25 | Sources of funding and other support, role of funders | No direct financial support for the study; in-kind logistical support from the College of Nursing and Midwifery, Nalerigu, disclosed | p.34 |

*Campbell MK, Piaggio G, Elbourne DR, Altman DG; for the CONSORT Group. CONSORT 2010 statement: extension to cluster randomised trials. BMJ. 2012;345:e5661. This checklist reports against the parallel-group CONSORT 2010 items (Schulz KF, Altman DG, Moher D; CONSORT Group. CONSORT 2010 Statement: updated guidelines for reporting parallel group randomised trials. BMJ 2010;340:c332) together with the cluster-trial extensions specific to items 1a, 2a, 2b, 3a, 4a, 5, 6a, 7a, 8b, 9, 10 (replaced by 10a–10c), 12a, 13a, 13b, 15, 16, 17a, and 21.*

*.*
